# Supplementary material
Source: publisher figshare collection journal article supplement (https://acs.figshare.com/ndownloader/files/4707442)
Supplement: Supplementary file 1 [file 4707442]

data_global

# 1. SUBMISSION DETAILS
_publ_contact_author
;
     Dr. Jason Wiles
     Achillion Pharmaceuticals
     300 George St
     New Haven, CT 06511
     USA
;
_publ_contact_author_phone    '+203 624 7000'

_publ_contact_author_fax '+203 752 5454'

_publ_contact_author_email    jwiles@achillion.com

_publ_requested_journal       
;
Organic Process Research and Development Organic Letters
;

# 2. TITLE AND AUTHOR LIST

_publ_section_title
;
Practical Synthesis and Molecular Structure of a Potent
Broad-Spectrum Antibacterial isothiazoloquinolone
;

loop_
_publ_author_name
_publ_author_address
'Hashimoto, A.'
;
     Achillion Pharmaceuticals
     300 George St
     New Haven, CT 06511
     USA
;
'Pais, G. C. G.'
;
     Achillion Pharmaceuticals
     300 George St
     New Haven, CT 06511
     USA
;
'Wang , Q.'
;
     Achillion Pharmaceuticals
     300 George St
     New Haven, CT 06511
     USA
;
'Lucien, E.'
;
     Achillion Pharmaceuticals
     300 George St
     New Haven, CT 06511
     USA
;
'Incarvito, C. D.'
;
     Department of Chemistry
     Yale University
     225 Prospect St
     PO Box 208107
     New Haven, CT 06520-8107
     USA
;
'Deshpande, M.'
;
     Achillion Pharmaceuticals
     300 George St
     New Haven, CT 06511
     USA
;
'Bradbury, B. J.'
;
     Achillion Pharmaceuticals
     300 George St
     New Haven, CT 06511
     USA
;
'Wiles, J. A.'
;
     Achillion Pharmaceuticals
     300 George St
     New Haven, CT 06511
     USA
;

# 3. Results

  
data_jw07 
  
_audit_creation_method            SHELXL-97 
_chemical_name_systematic 
; 
 ? 
; 
_chemical_name_common             ? 
_chemical_melting_point           ? 
_chemical_formula_moiety          ? 
_chemical_formula_sum 
 'C22 H17 F4 N3 O5 S' 
_chemical_formula_weight          511.45 
  
loop_ 
 _atom_type_symbol 
 _atom_type_description 
 _atom_type_scat_dispersion_real 
 _atom_type_scat_dispersion_imag 
 _atom_type_scat_source 
 'C'  'C'   0.0033   0.0016 
 'International Tables Vol C Tables 4.2.6.8 and 6.1.1.4' 
 'H'  'H'   0.0000   0.0000 
 'International Tables Vol C Tables 4.2.6.8 and 6.1.1.4' 
 'N'  'N'   0.0061   0.0033 
 'International Tables Vol C Tables 4.2.6.8 and 6.1.1.4' 
 'O'  'O'   0.0106   0.0060 
 'International Tables Vol C Tables 4.2.6.8 and 6.1.1.4' 
 'F'  'F'   0.0171   0.0103 
 'International Tables Vol C Tables 4.2.6.8 and 6.1.1.4' 
 'S'  'S'   0.1246   0.1234 
 'International Tables Vol C Tables 4.2.6.8 and 6.1.1.4' 
  
_symmetry_cell_setting            Triclinic 
_symmetry_space_group_name_H-M    P-1 
  
loop_ 
 _symmetry_equiv_pos_as_xyz 
 'x, y, z' 
 '-x, -y, -z' 
  
_cell_length_a                    8.2971(17) 
_cell_length_b                    9.7116(19) 
_cell_length_c                    14.452(3) 
_cell_angle_alpha                 81.00(3) 
_cell_angle_beta                  81.81(3) 
_cell_angle_gamma                 66.27(3) 
_cell_volume                      1048.9(4) 
_cell_formula_units_Z             2 
_cell_measurement_temperature     123(2) 
_cell_measurement_reflns_used     ? 
_cell_measurement_theta_min       ? 
_cell_measurement_theta_max       ? 
  
_exptl_crystal_description        plate 
_exptl_crystal_colour             colorless 
_exptl_crystal_size_max           0.20 
_exptl_crystal_size_mid           0.20 
_exptl_crystal_size_min           0.10 
_exptl_crystal_density_meas       ? 
_exptl_crystal_density_diffrn     1.619 
_exptl_crystal_density_method     'not measured' 
_exptl_crystal_F_000              524 
_exptl_absorpt_coefficient_mu     0.233 
_exptl_absorpt_correction_type    none 
_exptl_absorpt_correction_T_min   0.9548 
_exptl_absorpt_correction_T_max   0.9771 
_exptl_absorpt_process_details    ? 
  
_exptl_special_details 
; 
 ? 
; 
  
_diffrn_ambient_temperature       123(2) 
_diffrn_radiation_wavelength      0.71073 
_diffrn_radiation_type            MoK\a 
_diffrn_radiation_source          'fine-focus sealed tube' 
_diffrn_radiation_monochromator   graphite 
_diffrn_measurement_device_type   'Nonius KappaCCD' 
_diffrn_measurement_method        '\w scans' 
_diffrn_detector_area_resol_mean  ? 
_diffrn_standards_number          ? 
_diffrn_standards_interval_count  ? 
_diffrn_standards_interval_time   ? 
_diffrn_standards_decay_%         ? 
_diffrn_reflns_number             9166 
_diffrn_reflns_av_R_equivalents   0.0393 
_diffrn_reflns_av_sigmaI/netI     0.0744 
_diffrn_reflns_limit_h_min        -11 
_diffrn_reflns_limit_h_max        11 
_diffrn_reflns_limit_k_min        -13 
_diffrn_reflns_limit_k_max        13 
_diffrn_reflns_limit_l_min        -19 
_diffrn_reflns_limit_l_max        19 
_diffrn_reflns_theta_min          2.30 
_diffrn_reflns_theta_max          29.02 
_reflns_number_total              5529 
_reflns_number_gt                 3802 
_reflns_threshold_expression      >2sigma(I) 
  
_computing_data_collection        'Nonius Collect' 
_computing_cell_refinement        Denzo 
_computing_data_reduction         Denzo 
_computing_structure_solution     'SHELXS-97 (Sheldrick, 1990)' 
_computing_structure_refinement   'SHELXL-97 (Sheldrick, 1997)' 
_computing_molecular_graphics     'Bruker SHELXTL' 
_computing_publication_material   'Bruker SHELXTL' 
  
_refine_special_details 
; 
 Refinement of F^2^ against ALL reflections.  The weighted R-factor wR and 
 goodness of fit S are based on F^2^, conventional R-factors R are based 
 on F, with F set to zero for negative F^2^. The threshold expression of 
 F^2^ > 2sigma(F^2^) is used only for calculating R-factors(gt) etc. and is 
 not relevant to the choice of reflections for refinement.  R-factors based 
 on F^2^ are statistically about twice as large as those based on F, and R- 
 factors based on ALL data will be even larger. 
; 
  
_refine_ls_structure_factor_coef  Fsqd 
_refine_ls_matrix_type            full 
_refine_ls_weighting_scheme       calc 
_refine_ls_weighting_details 
 'calc w=1/[\s^2^(Fo^2^)+(0.0800P)^2^+0.0000P] where P=(Fo^2^+2Fc^2^)/3' 
_atom_sites_solution_primary      direct 
_atom_sites_solution_secondary    difmap 
_atom_sites_solution_hydrogens    geom 
_refine_ls_hydrogen_treatment     mixed 
_refine_ls_extinction_method      none 
_refine_ls_extinction_coef        ? 
_refine_ls_number_reflns          5529 
_refine_ls_number_parameters      324 
_refine_ls_number_restraints      0 
_refine_ls_R_factor_all           0.0887 
_refine_ls_R_factor_gt            0.0533 
_refine_ls_wR_factor_ref          0.1499 
_refine_ls_wR_factor_gt           0.1352 
_refine_ls_goodness_of_fit_ref    1.067 
_refine_ls_restrained_S_all       1.067 
_refine_ls_shift/su_max           0.005 
_refine_ls_shift/su_mean          0.001 
  
loop_ 
 _atom_site_label 
 _atom_site_type_symbol 
 _atom_site_fract_x 
 _atom_site_fract_y 
 _atom_site_fract_z 
 _atom_site_U_iso_or_equiv 
 _atom_site_adp_type 
 _atom_site_occupancy 
 _atom_site_symmetry_multiplicity 
 _atom_site_calc_flag 
 _atom_site_refinement_flags 
 _atom_site_disorder_assembly 
 _atom_site_disorder_group 
S1 S 0.92711(7) 0.36860(6) 0.50707(4) 0.01918(15) Uani 1 1 d . . . 
F1 F 0.34327(15) 0.00796(14) 0.31741(9) 0.0232(3) Uani 1 1 d . . . 
O1 O 0.5394(2) 0.41932(18) 0.68484(11) 0.0224(3) Uani 1 1 d . . . 
H1 H 0.569(4) 0.459(3) 0.727(2) 0.053(9) Uiso 1 1 d . . . 
O2 O 0.36951(18) 0.28947(16) 0.57071(10) 0.0199(3) Uani 1 1 d . . . 
O3 O 0.89764(17) 0.04929(15) 0.24380(9) 0.0166(3) Uani 1 1 d . . . 
N1 N 0.8026(2) 0.41846(19) 0.60740(12) 0.0188(4) Uani 1 1 d . . . 
N2 N 0.8127(2) 0.24647(18) 0.38535(12) 0.0156(4) Uani 1 1 d . . . 
N3 N 0.7001(2) -0.2072(2) 0.04389(12) 0.0198(4) Uani 1 1 d . . . 
H3 H 0.709(3) -0.262(3) -0.0089(19) 0.036(7) Uiso 1 1 d . . . 
C1 C 0.6613(3) 0.3880(2) 0.61182(14) 0.0168(4) Uani 1 1 d . . . 
C2 C 0.6432(3) 0.3193(2) 0.53491(14) 0.0165(4) Uani 1 1 d . . . 
C3 C 0.5053(3) 0.2749(2) 0.51773(14) 0.0165(4) Uani 1 1 d . . . 
C4 C 0.5421(3) 0.2013(2) 0.42995(14) 0.0153(4) Uani 1 1 d . . . 
C5 C 0.4230(3) 0.1429(2) 0.41153(15) 0.0173(4) Uani 1 1 d . . . 
H5A H 0.3172 0.1577 0.4513 0.021 Uiso 1 1 calc R . . 
C6 C 0.4604(3) 0.0641(2) 0.33548(15) 0.0177(4) Uani 1 1 d . . . 
C7 C 0.6150(3) 0.0354(2) 0.27579(13) 0.0157(4) Uani 1 1 d . . . 
C8 C 0.7352(3) 0.0920(2) 0.29505(14) 0.0159(4) Uani 1 1 d . . . 
C9 C 0.6973(3) 0.1819(2) 0.36924(14) 0.0153(4) Uani 1 1 d . . . 
C10 C 0.7865(3) 0.3038(2) 0.46881(14) 0.0158(4) Uani 1 1 d . . . 
C11 C 0.6510(3) -0.0533(2) 0.19547(14) 0.0164(4) Uani 1 1 d . . . 
C12 C 0.7021(3) 0.0015(2) 0.10578(14) 0.0185(4) Uani 1 1 d . . . 
H12A H 0.7197 0.0936 0.0971 0.022 Uiso 1 1 calc R . . 
C13 C 0.7273(3) -0.0769(2) 0.02983(15) 0.0187(4) Uani 1 1 d . . . 
C14 C 0.6535(3) -0.2643(2) 0.12954(15) 0.0211(5) Uani 1 1 d . . . 
H14A H 0.6366 -0.3567 0.1364 0.025 Uiso 1 1 calc R . . 
C15 C 0.6300(3) -0.1909(2) 0.20694(15) 0.0192(4) Uani 1 1 d . . . 
H15A H 0.6000 -0.2328 0.2675 0.023 Uiso 1 1 calc R . . 
C16 C 0.7835(3) -0.0278(3) -0.06876(15) 0.0259(5) Uani 1 1 d . . . 
H16A H 0.7933 -0.1020 -0.1103 0.039 Uiso 1 1 calc R . . 
H16B H 0.8983 -0.0207 -0.0702 0.039 Uiso 1 1 calc R . . 
H16C H 0.6955 0.0712 -0.0902 0.039 Uiso 1 1 calc R . . 
C17 C 1.0201(3) -0.0914(2) 0.28633(15) 0.0220(5) Uani 1 1 d . . . 
H17A H 1.1346 -0.1201 0.2489 0.033 Uiso 1 1 calc R . . 
H17B H 0.9743 -0.1706 0.2887 0.033 Uiso 1 1 calc R . . 
H17C H 1.0348 -0.0794 0.3503 0.033 Uiso 1 1 calc R . . 
C18 C 0.9438(3) 0.2737(2) 0.31479(14) 0.0170(4) Uani 1 1 d . . . 
H18A H 1.0666 0.1944 0.3150 0.020 Uiso 1 1 calc R . . 
C19 C 0.8868(3) 0.3562(2) 0.22200(15) 0.0217(5) Uani 1 1 d . . . 
H19A H 0.7614 0.3870 0.2108 0.026 Uiso 1 1 calc R . . 
H19B H 0.9717 0.3270 0.1660 0.026 Uiso 1 1 calc R . . 
C20 C 0.9273(3) 0.4356(2) 0.29143(15) 0.0220(5) Uani 1 1 d . . . 
H20A H 0.8269 0.5145 0.3232 0.026 Uiso 1 1 calc R . . 
H20B H 1.0376 0.4544 0.2784 0.026 Uiso 1 1 calc R . . 
C21 C 0.7616(4) -0.5684(3) -0.07327(18) 0.0333(6) Uani 1 1 d . . . 
F2 F 0.8367(4) -0.55137(19) -0.00438(14) 0.0898(8) Uani 1 1 d . . . 
F3 F 0.6607(3) -0.6441(2) -0.03438(17) 0.0861(8) Uani 1 1 d . . . 
F4 F 0.8887(2) -0.66329(18) -0.12638(12) 0.0538(5) Uani 1 1 d . . . 
C22 C 0.6540(3) -0.4190(3) -0.12915(16) 0.0256(5) Uani 1 1 d . . . 
O4 O 0.6699(2) -0.30498(17) -0.11070(11) 0.0293(4) Uani 1 1 d . . . 
O5 O 0.5627(2) -0.4291(2) -0.18601(13) 0.0455(5) Uani 1 1 d . . . 
  
loop_ 
 _atom_site_aniso_label 
 _atom_site_aniso_U_11 
 _atom_site_aniso_U_22 
 _atom_site_aniso_U_33 
 _atom_site_aniso_U_23 
 _atom_site_aniso_U_13 
 _atom_site_aniso_U_12 
S1 0.0208(3) 0.0221(3) 0.0191(3) -0.0054(2) -0.0014(2) -0.0120(2) 
F1 0.0185(6) 0.0281(7) 0.0293(7) -0.0120(6) -0.0013(5) -0.0124(5) 
O1 0.0272(8) 0.0289(9) 0.0171(8) -0.0103(7) 0.0026(6) -0.0158(7) 
O2 0.0192(8) 0.0256(8) 0.0172(8) -0.0070(6) 0.0019(6) -0.0103(6) 
O3 0.0165(7) 0.0171(7) 0.0144(7) -0.0025(6) 0.0011(6) -0.0052(6) 
N1 0.0226(9) 0.0196(9) 0.0170(9) -0.0044(7) -0.0030(7) -0.0098(8) 
N2 0.0175(9) 0.0170(8) 0.0145(9) -0.0039(7) 0.0000(7) -0.0087(7) 
N3 0.0259(10) 0.0182(9) 0.0166(9) -0.0056(7) -0.0023(7) -0.0084(8) 
C1 0.0210(10) 0.0141(10) 0.0160(10) -0.0022(8) -0.0039(8) -0.0065(8) 
C2 0.0180(10) 0.0146(10) 0.0169(10) -0.0019(8) -0.0039(8) -0.0055(8) 
C3 0.0194(10) 0.0152(10) 0.0153(10) -0.0024(8) -0.0028(8) -0.0063(8) 
C4 0.0155(10) 0.0154(10) 0.0147(10) -0.0023(8) -0.0027(8) -0.0049(8) 
C5 0.0157(10) 0.0178(10) 0.0185(11) -0.0041(8) -0.0001(8) -0.0065(8) 
C6 0.0175(10) 0.0181(10) 0.0212(11) -0.0044(8) -0.0037(8) -0.0093(8) 
C7 0.0205(10) 0.0143(10) 0.0123(10) -0.0017(8) -0.0045(8) -0.0056(8) 
C8 0.0178(10) 0.0136(9) 0.0140(10) -0.0010(8) -0.0005(8) -0.0042(8) 
C9 0.0178(10) 0.0142(9) 0.0147(10) -0.0021(8) -0.0031(8) -0.0064(8) 
C10 0.0182(10) 0.0147(10) 0.0162(10) -0.0007(8) -0.0042(8) -0.0076(8) 
C11 0.0147(10) 0.0153(10) 0.0181(10) -0.0048(8) -0.0028(8) -0.0034(8) 
C12 0.0215(11) 0.0171(10) 0.0185(11) -0.0027(8) -0.0030(8) -0.0084(9) 
C13 0.0192(11) 0.0169(10) 0.0185(11) -0.0026(8) -0.0019(8) -0.0053(8) 
C14 0.0279(12) 0.0165(10) 0.0184(11) -0.0009(9) -0.0024(9) -0.0084(9) 
C15 0.0248(11) 0.0167(10) 0.0158(10) -0.0028(8) -0.0012(8) -0.0076(9) 
C16 0.0368(13) 0.0249(12) 0.0179(11) -0.0050(9) 0.0041(10) -0.0151(10) 
C17 0.0188(11) 0.0204(11) 0.0214(11) -0.0027(9) -0.0004(8) -0.0024(9) 
C18 0.0163(10) 0.0170(10) 0.0189(11) -0.0031(8) 0.0012(8) -0.0081(8) 
C19 0.0287(12) 0.0218(11) 0.0156(11) -0.0023(9) 0.0015(9) -0.0120(9) 
C20 0.0277(12) 0.0210(11) 0.0211(11) -0.0030(9) 0.0019(9) -0.0143(9) 
C21 0.0480(16) 0.0248(12) 0.0273(13) -0.0076(10) 0.0014(11) -0.0142(12) 
F2 0.158(2) 0.0344(10) 0.0646(13) -0.0017(9) -0.0754(15) -0.0052(12) 
F3 0.0868(15) 0.0376(10) 0.1169(19) 0.0037(11) 0.0414(14) -0.0275(10) 
F4 0.0500(10) 0.0393(9) 0.0501(10) -0.0117(8) 0.0074(8) 0.0038(8) 
C22 0.0249(12) 0.0323(13) 0.0227(12) -0.0146(10) 0.0002(9) -0.0109(10) 
O4 0.0436(10) 0.0257(9) 0.0218(8) -0.0061(7) -0.0080(7) -0.0137(8) 
O5 0.0358(11) 0.0577(12) 0.0467(12) -0.0351(10) -0.0102(9) -0.0094(9) 
  
_geom_special_details 
; 
 All esds (except the esd in the dihedral angle between two l.s. planes) 
 are estimated using the full covariance matrix.  The cell esds are taken 
 into account individually in the estimation of esds in distances, angles 
 and torsion angles; correlations between esds in cell parameters are only 
 used when they are defined by crystal symmetry.  An approximate (isotropic) 
 treatment of cell esds is used for estimating esds involving l.s. planes. 
; 
  
loop_ 
 _geom_bond_atom_site_label_1 
 _geom_bond_atom_site_label_2 
 _geom_bond_distance 
 _geom_bond_site_symmetry_2 
 _geom_bond_publ_flag 
S1 N1 1.6717(19) . ? 
S1 C10 1.717(2) . ? 
F1 C6 1.361(2) . ? 
O1 H1 0.89(3) . ? 
O1 C1 1.333(3) . ? 
O2 C3 1.239(2) . ? 
O3 C8 1.378(2) . ? 
O3 C17 1.441(2) . ? 
N1 C1 1.311(3) . ? 
N2 C10 1.360(3) . ? 
N2 C9 1.399(3) . ? 
N2 C18 1.457(3) . ? 
N3 H3 0.97(3) . ? 
N3 C14 1.346(3) . ? 
N3 C13 1.353(3) . ? 
C1 C2 1.436(3) . ? 
C2 C10 1.388(3) . ? 
C2 C3 1.439(3) . ? 
C3 C4 1.487(3) . ? 
C4 C5 1.394(3) . ? 
C4 C9 1.414(3) . ? 
C5 C6 1.366(3) . ? 
C6 C7 1.393(3) . ? 
C7 C8 1.394(3) . ? 
C7 C11 1.479(3) . ? 
C8 C9 1.409(3) . ? 
C11 C15 1.397(3) . ? 
C11 C12 1.398(3) . ? 
C12 C13 1.377(3) . ? 
C13 C16 1.500(3) . ? 
C14 C15 1.369(3) . ? 
C18 C19 1.485(3) . ? 
C18 C20 1.509(3) . ? 
C19 C20 1.504(3) . ? 
C21 F2 1.311(3) . ? 
C21 F4 1.326(3) . ? 
C21 F3 1.337(3) . ? 
C21 C22 1.533(4) . ? 
C22 O5 1.233(3) . ? 
C22 O4 1.239(3) . ? 
  
loop_ 
 _geom_angle_atom_site_label_1 
 _geom_angle_atom_site_label_2 
 _geom_angle_atom_site_label_3 
 _geom_angle 
 _geom_angle_site_symmetry_1 
 _geom_angle_site_symmetry_3 
 _geom_angle_publ_flag 
N1 S1 C10 94.21(10) . . ? 
H1 O1 C1 111(2) . . ? 
C8 O3 C17 110.65(15) . . ? 
C1 N1 S1 109.78(15) . . ? 
C10 N2 C9 117.46(17) . . ? 
C10 N2 C18 117.63(17) . . ? 
C9 N2 C18 124.43(17) . . ? 
H3 N3 C14 116.9(15) . . ? 
H3 N3 C13 120.7(15) . . ? 
C14 N3 C13 122.37(19) . . ? 
N1 C1 O1 121.32(19) . . ? 
N1 C1 C2 117.32(18) . . ? 
O1 C1 C2 121.36(19) . . ? 
C10 C2 C1 108.49(18) . . ? 
C10 C2 C3 120.45(18) . . ? 
C1 C2 C3 131.01(18) . . ? 
O2 C3 C2 125.16(19) . . ? 
O2 C3 C4 121.12(18) . . ? 
C2 C3 C4 113.67(17) . . ? 
C5 C4 C9 120.17(19) . . ? 
C5 C4 C3 117.75(18) . . ? 
C9 C4 C3 121.97(18) . . ? 
C6 C5 C4 119.09(19) . . ? 
F1 C6 C5 118.91(18) . . ? 
F1 C6 C7 117.86(18) . . ? 
C5 C6 C7 123.2(2) . . ? 
C6 C7 C8 117.63(18) . . ? 
C6 C7 C11 121.09(19) . . ? 
C8 C7 C11 121.28(18) . . ? 
O3 C8 C7 118.20(18) . . ? 
O3 C8 C9 120.52(19) . . ? 
C7 C8 C9 121.13(18) . . ? 
N2 C9 C8 121.35(18) . . ? 
N2 C9 C4 120.12(18) . . ? 
C8 C9 C4 118.48(19) . . ? 
N2 C10 C2 125.38(19) . . ? 
N2 C10 S1 124.43(15) . . ? 
C2 C10 S1 110.19(15) . . ? 
C15 C11 C12 118.73(19) . . ? 
C15 C11 C7 120.97(18) . . ? 
C12 C11 C7 120.27(18) . . ? 
C13 C12 C11 120.57(19) . . ? 
N3 C13 C12 118.56(19) . . ? 
N3 C13 C16 117.01(19) . . ? 
C12 C13 C16 124.44(19) . . ? 
N3 C14 C15 120.7(2) . . ? 
C14 C15 C11 118.99(19) . . ? 
N2 C18 C19 118.79(18) . . ? 
N2 C18 C20 116.67(17) . . ? 
C19 C18 C20 60.31(14) . . ? 
C18 C19 C20 60.66(14) . . ? 
C19 C20 C18 59.03(14) . . ? 
F2 C21 F4 106.8(2) . . ? 
F2 C21 F3 106.3(2) . . ? 
F4 C21 F3 104.9(2) . . ? 
F2 C21 C22 113.7(2) . . ? 
F4 C21 C22 113.0(2) . . ? 
F3 C21 C22 111.5(2) . . ? 
O5 C22 O4 129.0(2) . . ? 
O5 C22 C21 115.3(2) . . ? 
O4 C22 C21 115.7(2) . . ? 
  
_diffrn_measured_fraction_theta_max    0.987 
_diffrn_reflns_theta_full              29.02 
_diffrn_measured_fraction_theta_full   0.987 
_refine_diff_density_max    0.524 
_refine_diff_density_min   -0.510 
_refine_diff_density_rms    0.073 

#===END

  
data_jw05 
  
_audit_creation_method            SHELXL-97 
_chemical_name_systematic 
; 
 ? 
; 
_chemical_name_common             ? 
_chemical_melting_point           ? 
_chemical_formula_moiety          ? 
_chemical_formula_sum 
 'C18 H12 F8 N2 O7 S' 
_chemical_formula_weight          552.36 
  
loop_ 
 _atom_type_symbol 
 _atom_type_description 
 _atom_type_scat_dispersion_real 
 _atom_type_scat_dispersion_imag 
 _atom_type_scat_source 
 'C'  'C'   0.0033   0.0016 
 'International Tables Vol C Tables 4.2.6.8 and 6.1.1.4' 
 'H'  'H'   0.0000   0.0000 
 'International Tables Vol C Tables 4.2.6.8 and 6.1.1.4' 
 'N'  'N'   0.0061   0.0033 
 'International Tables Vol C Tables 4.2.6.8 and 6.1.1.4' 
 'O'  'O'   0.0106   0.0060 
 'International Tables Vol C Tables 4.2.6.8 and 6.1.1.4' 
 'F'  'F'   0.0171   0.0103 
 'International Tables Vol C Tables 4.2.6.8 and 6.1.1.4' 
 'S'  'S'   0.1246   0.1234 
 'International Tables Vol C Tables 4.2.6.8 and 6.1.1.4' 
  
_symmetry_cell_setting            Triclinic 
_symmetry_space_group_name_H-M    P-1 
  
loop_ 
 _symmetry_equiv_pos_as_xyz 
 'x, y, z' 
 '-x, -y, -z' 
  
_cell_length_a                    8.6649(17) 
_cell_length_b                    9.1625(18) 
_cell_length_c                    14.151(3) 
_cell_angle_alpha                 79.77(3) 
_cell_angle_beta                  74.02(3) 
_cell_angle_gamma                 74.16(3) 
_cell_volume                      1032.6(4) 
_cell_formula_units_Z             2 
_cell_measurement_temperature     173(2) 
_cell_measurement_reflns_used     ? 
_cell_measurement_theta_min       ? 
_cell_measurement_theta_max       ? 
  
_exptl_crystal_description        block 
_exptl_crystal_colour             colorless 
_exptl_crystal_size_max           0.35 
_exptl_crystal_size_mid           0.20 
_exptl_crystal_size_min           0.20 
_exptl_crystal_density_meas       ? 
_exptl_crystal_density_diffrn     1.776 
_exptl_crystal_density_method     'not measured' 
_exptl_crystal_F_000              556 
_exptl_absorpt_coefficient_mu     0.276 
_exptl_absorpt_correction_type    none 
_exptl_absorpt_correction_T_min   0.9096 
_exptl_absorpt_correction_T_max   0.9469 
_exptl_absorpt_process_details    ? 
  
_exptl_special_details 
; 
 ? 
; 
  
_diffrn_ambient_temperature       173(2) 
_diffrn_radiation_wavelength      0.71073 
_diffrn_radiation_type            MoK\a 
_diffrn_radiation_source          'fine-focus sealed tube' 
_diffrn_radiation_monochromator   graphite 
_diffrn_measurement_device_type   'Nonius KappaCCD' 
_diffrn_measurement_method        '\w scans' 
_diffrn_detector_area_resol_mean  ? 
_diffrn_standards_number          ? 
_diffrn_standards_interval_count  ? 
_diffrn_standards_interval_time   ? 
_diffrn_standards_decay_%         ? 
_diffrn_reflns_number             8913 
_diffrn_reflns_av_R_equivalents   0.0368 
_diffrn_reflns_av_sigmaI/netI     0.0551 
_diffrn_reflns_limit_h_min        -11 
_diffrn_reflns_limit_h_max        11 
_diffrn_reflns_limit_k_min        -12 
_diffrn_reflns_limit_k_max        12 
_diffrn_reflns_limit_l_min        -19 
_diffrn_reflns_limit_l_max        19 
_diffrn_reflns_theta_min          2.32 
_diffrn_reflns_theta_max          29.06 
_reflns_number_total              5385 
_reflns_number_gt                 4065 
_reflns_threshold_expression      >2sigma(I) 
  
_computing_data_collection        'Nonius Collect' 
_computing_cell_refinement        Denzo 
_computing_data_reduction         Denzo 
_computing_structure_solution     'SHELXS-97 (Sheldrick, 1990)' 
_computing_structure_refinement   'SHELXL-97 (Sheldrick, 1997)' 
_computing_molecular_graphics     'Bruker SHELXTL' 
_computing_publication_material   'Bruker SHELXTL' 
  
_refine_special_details 
; 
 Refinement of F^2^ against ALL reflections.  The weighted R-factor wR and 
 goodness of fit S are based on F^2^, conventional R-factors R are based 
 on F, with F set to zero for negative F^2^. The threshold expression of 
 F^2^ > 2sigma(F^2^) is used only for calculating R-factors(gt) etc. and is 
 not relevant to the choice of reflections for refinement.  R-factors based 
 on F^2^ are statistically about twice as large as those based on F, and R- 
 factors based on ALL data will be even larger. 
; 
  
_refine_ls_structure_factor_coef  Fsqd 
_refine_ls_matrix_type            full 
_refine_ls_weighting_scheme       calc 
_refine_ls_weighting_details 
 'calc w=1/[\s^2^(Fo^2^)+(0.1000P)^2^+0.0000P] where P=(Fo^2^+2Fc^2^)/3' 
_atom_sites_solution_primary      direct 
_atom_sites_solution_secondary    difmap 
_atom_sites_solution_hydrogens    geom 
_refine_ls_hydrogen_treatment     mixed 
_refine_ls_extinction_method      none 
_refine_ls_extinction_coef        ? 
_refine_ls_number_reflns          5385 
_refine_ls_number_parameters      365 
_refine_ls_number_restraints      0 
_refine_ls_R_factor_all           0.0811 
_refine_ls_R_factor_gt            0.0598 
_refine_ls_wR_factor_ref          0.1858 
_refine_ls_wR_factor_gt           0.1742 
_refine_ls_goodness_of_fit_ref    1.262 
_refine_ls_restrained_S_all       1.262 
_refine_ls_shift/su_max           4.123 
_refine_ls_shift/su_mean          0.184 
  
loop_ 
 _atom_site_label 
 _atom_site_type_symbol 
 _atom_site_fract_x 
 _atom_site_fract_y 
 _atom_site_fract_z 
 _atom_site_U_iso_or_equiv 
 _atom_site_adp_type 
 _atom_site_occupancy 
 _atom_site_symmetry_multiplicity 
 _atom_site_calc_flag 
 _atom_site_refinement_flags 
 _atom_site_disorder_assembly 
 _atom_site_disorder_group 
S1 S 0.35431(4) 0.57268(4) 0.32101(2) 0.02686(8) Uani 1 1 d . . . 
F1 F 0.76957(11) 0.94344(10) 0.62792(7) 0.0402(2) Uani 1 1 d . . . 
F2 F 0.97189(9) 0.88842(9) 0.45261(6) 0.0353(2) Uani 1 1 d . . . 
O1 O 0.07894(11) 0.57812(11) 0.58056(7) 0.0297(2) Uani 1 1 d . . . 
O2 O 0.28416(12) 0.73912(13) 0.64632(8) 0.0373(3) Uani 1 1 d . . . 
O3 O 0.88624(12) 0.76734(11) 0.31496(8) 0.0318(2) Uani 1 1 d . . . 
N1 N 0.19748(13) 0.54125(13) 0.41894(8) 0.0268(3) Uani 1 1 d . . . 
H1 H 0.110(2) 0.498(2) 0.4013(13) 0.050(5) Uiso 1 1 d . . . 
N2 N 0.56204(13) 0.71494(12) 0.35901(8) 0.0230(2) Uani 1 1 d . . . 
C1 C 0.19080(16) 0.59208(15) 0.50437(10) 0.0248(3) Uani 1 1 d . . . 
C2 C 0.32873(15) 0.66109(15) 0.49026(10) 0.0237(3) Uani 1 1 d . . . 
C3 C 0.36930(16) 0.72820(15) 0.56120(10) 0.0250(3) Uani 1 1 d . . . 
C4 C 0.52321(16) 0.78112(15) 0.52464(10) 0.0243(3) Uani 1 1 d . . . 
C5 C 0.57181(17) 0.84187(15) 0.59291(11) 0.0276(3) Uani 1 1 d . . . 
H5A H 0.5034 0.8540 0.6576 0.033 Uiso 1 1 calc R . . 
C6 C 0.71890(17) 0.88321(16) 0.56499(11) 0.0294(3) Uani 1 1 d . . . 
C7 C 0.82217(16) 0.85945(15) 0.47206(11) 0.0277(3) Uani 1 1 d . . . 
C8 C 0.77895(16) 0.80210(15) 0.40195(10) 0.0251(3) Uani 1 1 d . . . 
C9 C 0.62045(15) 0.76689(14) 0.42765(10) 0.0230(3) Uani 1 1 d . . . 
C10 C 0.42409(16) 0.65943(15) 0.39431(10) 0.0233(3) Uani 1 1 d . . . 
C11 C 0.97879(18) 0.87870(19) 0.26042(13) 0.0387(4) Uani 1 1 d . . . 
H11A H 1.0518 0.8396 0.1993 0.058 Uiso 1 1 calc R . . 
H11B H 1.0452 0.8972 0.3011 0.058 Uiso 1 1 calc R . . 
H11C H 0.9019 0.9744 0.2441 0.058 Uiso 1 1 calc R . . 
C12 C 0.63501(17) 0.71692(16) 0.25298(10) 0.0272(3) Uani 1 1 d . . . 
H12A H 0.7194 0.6227 0.2313 0.033 Uiso 1 1 calc R . . 
C13 C 0.65781(19) 0.86244(19) 0.19111(11) 0.0376(4) Uani 1 1 d . . . 
H13A H 0.7554 0.8576 0.1344 0.045 Uiso 1 1 calc R . . 
H13B H 0.6254 0.9559 0.2249 0.045 Uiso 1 1 calc R . . 
C14 C 0.52339(19) 0.79460(18) 0.18457(11) 0.0356(4) Uani 1 1 d . . . 
H14A H 0.5382 0.7472 0.1240 0.043 Uiso 1 1 calc R . . 
H14B H 0.4080 0.8456 0.2146 0.043 Uiso 1 1 calc R . . 
C15 C 0.2267(2) 0.2441(2) 0.11592(14) 0.0495(5) Uani 1 1 d . . . 
F3 F 0.38148(16) 0.2371(2) 0.08193(12) 0.1243(5) Uani 1 1 d . . . 
F4 F 0.1553(2) 0.31571(19) 0.04548(9) 0.0937(5) Uani 1 1 d . . . 
F5 F 0.2024(2) 0.10458(16) 0.13085(11) 0.0938(5) Uani 1 1 d . . . 
C16 C 0.15679(18) 0.32195(18) 0.21071(11) 0.0341(4) Uani 1 1 d . . . 
O4 O 0.24169(14) 0.36691(14) 0.24603(9) 0.0456(3) Uani 1 1 d . . . 
O5 O 0.00024(14) 0.32601(18) 0.24306(9) 0.0571(4) Uani 1 1 d . . . 
H5 H -0.038(3) 0.366(3) 0.2911(18) 0.084(8) Uiso 1 1 d . . . 
C17 C 0.7690(3) 1.2757(3) 0.00297(14) 0.0594(5) Uani 1 1 d . . . 
F6 F 0.6696(3) 1.3701(2) -0.05131(12) 0.0777(6) Uani 0.65 1 d P A 1 
F7 F 0.7403(3) 1.1429(2) 0.00262(14) 0.0824(8) Uani 0.65 1 d P A 1 
F8 F 0.9144(3) 1.2817(3) -0.03952(18) 0.0978(8) Uani 0.65 1 d P A 1 
F6' F 0.6994(6) 1.2068(8) -0.0207(4) 0.134(2) Uani 0.35 1 d P A 2 
F7' F 0.9257(5) 1.1469(5) -0.0047(3) 0.0827(13) Uani 0.35 1 d P A 2 
F8' F 0.8696(7) 1.3569(5) -0.0637(3) 0.0957(18) Uani 0.35 1 d P A 2 
C18 C 0.7240(2) 1.32505(19) 0.10669(13) 0.0438(4) Uani 1 1 d . A . 
O6 O 0.6789(3) 1.45552(17) 0.11846(11) 0.0898(6) Uani 1 1 d . . . 
O7 O 0.73899(16) 1.21103(13) 0.17351(9) 0.0444(3) Uani 1 1 d . . . 
H7 H 0.732(2) 1.234(2) 0.2315(16) 0.062(6) Uiso 1 1 d . A . 
  
loop_ 
 _atom_site_aniso_label 
 _atom_site_aniso_U_11 
 _atom_site_aniso_U_22 
 _atom_site_aniso_U_33 
 _atom_site_aniso_U_23 
 _atom_site_aniso_U_13 
 _atom_site_aniso_U_12 
S1 0.02815(14) 0.03271(16) 0.02319(15) -0.00553(12) -0.00456(12) -0.01297(12) 
F1 0.0471(4) 0.0494(4) 0.0372(4) -0.0117(4) -0.0134(4) -0.0251(4) 
F2 0.0300(4) 0.0420(4) 0.0415(5) -0.0048(4) -0.0093(3) -0.0199(3) 
O1 0.0269(4) 0.0370(5) 0.0260(5) -0.0041(4) -0.0016(4) -0.0130(4) 
O2 0.0326(5) 0.0581(6) 0.0252(5) -0.0122(4) -0.0006(4) -0.0185(4) 
O3 0.0265(4) 0.0367(5) 0.0317(5) -0.0077(4) 0.0004(4) -0.0115(4) 
N1 0.0258(5) 0.0331(5) 0.0238(5) -0.0044(4) -0.0043(4) -0.0118(4) 
N2 0.0229(5) 0.0273(5) 0.0203(5) -0.0031(4) -0.0032(4) -0.0101(4) 
C1 0.0233(5) 0.0259(6) 0.0258(6) -0.0022(5) -0.0071(5) -0.0061(5) 
C2 0.0219(5) 0.0254(6) 0.0243(6) -0.0028(5) -0.0060(5) -0.0063(5) 
C3 0.0233(5) 0.0289(6) 0.0231(6) -0.0017(5) -0.0058(5) -0.0069(5) 
C4 0.0254(6) 0.0245(6) 0.0241(6) -0.0016(5) -0.0079(5) -0.0066(5) 
C5 0.0296(6) 0.0301(6) 0.0252(6) -0.0055(5) -0.0074(5) -0.0083(5) 
C6 0.0330(6) 0.0308(6) 0.0298(7) -0.0066(5) -0.0108(5) -0.0110(5) 
C7 0.0266(6) 0.0268(6) 0.0332(7) -0.0008(5) -0.0101(5) -0.0106(5) 
C8 0.0235(6) 0.0235(6) 0.0274(7) -0.0034(5) -0.0040(5) -0.0057(5) 
C9 0.0242(5) 0.0210(5) 0.0245(6) -0.0030(5) -0.0066(5) -0.0056(4) 
C10 0.0234(5) 0.0238(6) 0.0234(6) -0.0013(5) -0.0080(5) -0.0052(5) 
C11 0.0300(6) 0.0501(8) 0.0362(8) 0.0013(7) -0.0033(6) -0.0187(6) 
C12 0.0281(6) 0.0319(6) 0.0223(6) -0.0072(5) -0.0017(5) -0.0101(5) 
C13 0.0441(7) 0.0473(8) 0.0250(7) 0.0018(6) -0.0053(6) -0.0233(6) 
C14 0.0396(7) 0.0460(8) 0.0251(7) 0.0016(6) -0.0087(6) -0.0192(6) 
C15 0.0429(8) 0.0749(11) 0.0374(9) -0.0181(8) 0.0012(7) -0.0282(8) 
F3 0.0542(7) 0.2353(14) 0.1027(9) -0.1072(9) 0.0354(7) -0.0643(8) 
F4 0.1288(12) 0.1202(11) 0.0360(6) -0.0169(7) -0.0232(7) -0.0272(9) 
F5 0.1284(11) 0.0768(7) 0.0777(8) -0.0397(6) 0.0117(8) -0.0438(7) 
C16 0.0321(6) 0.0445(8) 0.0287(7) -0.0026(6) -0.0052(6) -0.0169(6) 
O4 0.0465(5) 0.0625(6) 0.0386(6) -0.0120(5) -0.0073(5) -0.0295(5) 
O5 0.0362(5) 0.1110(9) 0.0339(6) -0.0262(6) 0.0010(5) -0.0315(6) 
C17 0.0760(12) 0.0757(12) 0.0340(9) -0.0161(8) -0.0051(9) -0.0320(10) 
F6 0.1309(15) 0.0809(12) 0.0372(8) -0.0004(8) -0.0463(9) -0.0283(11) 
F7 0.1633(19) 0.0453(9) 0.0430(9) -0.0209(7) -0.0342(11) -0.0120(11) 
F8 0.0650(12) 0.161(2) 0.0792(14) -0.0571(14) -0.0016(11) -0.0349(14) 
F6' 0.092(3) 0.248(6) 0.103(3) -0.089(3) -0.021(3) -0.066(3) 
F7' 0.081(3) 0.098(3) 0.0481(19) -0.0332(18) -0.0091(18) 0.023(2) 
F8' 0.152(4) 0.058(2) 0.042(2) 0.0002(18) 0.008(2) -0.003(2) 
C18 0.0630(10) 0.0393(8) 0.0319(8) -0.0070(6) -0.0136(7) -0.0126(7) 
O6 0.1770(17) 0.0405(7) 0.0497(8) -0.0081(6) -0.0352(10) -0.0123(9) 
O7 0.0648(7) 0.0419(6) 0.0327(6) -0.0102(5) -0.0161(5) -0.0145(5) 
  
_geom_special_details 
; 
 All esds (except the esd in the dihedral angle between two l.s. planes) 
 are estimated using the full covariance matrix.  The cell esds are taken 
 into account individually in the estimation of esds in distances, angles 
 and torsion angles; correlations between esds in cell parameters are only 
 used when they are defined by crystal symmetry.  An approximate (isotropic) 
 treatment of cell esds is used for estimating esds involving l.s. planes. 
; 
  
loop_ 
 _geom_bond_atom_site_label_1 
 _geom_bond_atom_site_label_2 
 _geom_bond_distance 
 _geom_bond_site_symmetry_2 
 _geom_bond_publ_flag 
S1 N1 1.6986(13) . ? 
S1 C10 1.7245(16) . ? 
F1 C6 1.3462(18) . ? 
F2 C7 1.3396(16) . ? 
O1 C1 1.2496(16) . ? 
O2 C3 1.2322(17) . ? 
O3 C8 1.3523(17) . ? 
O3 C11 1.4512(19) . ? 
N1 H1 1.05(2) . ? 
N1 C1 1.3521(19) . ? 
N2 C10 1.3601(17) . ? 
N2 C9 1.4115(19) . ? 
N2 C12 1.4579(18) . ? 
C1 C2 1.4508(19) . ? 
C2 C10 1.3817(19) . ? 
C2 C3 1.429(2) . ? 
C3 C4 1.4715(19) . ? 
C4 C5 1.401(2) . ? 
C4 C9 1.4063(19) . ? 
C5 C6 1.363(2) . ? 
C6 C7 1.387(2) . ? 
C7 C8 1.378(2) . ? 
C8 C9 1.4310(19) . ? 
C12 C13 1.489(2) . ? 
C12 C14 1.508(2) . ? 
C13 C14 1.492(2) . ? 
C15 F3 1.282(2) . ? 
C15 F4 1.301(2) . ? 
C15 F5 1.323(2) . ? 
C15 C16 1.527(2) . ? 
C16 O4 1.184(2) . ? 
C16 O5 1.2990(19) . ? 
O5 H5 0.78(2) . ? 
C17 F6' 1.126(6) . ? 
C17 F8 1.250(3) . ? 
C17 F7 1.307(3) . ? 
C17 F6 1.342(3) . ? 
C17 F8' 1.362(5) . ? 
C17 F7' 1.529(4) . ? 
C17 C18 1.528(3) . ? 
C18 O6 1.179(2) . ? 
C18 O7 1.283(2) . ? 
O7 H7 0.86(2) . ? 
  
loop_ 
 _geom_angle_atom_site_label_1 
 _geom_angle_atom_site_label_2 
 _geom_angle_atom_site_label_3 
 _geom_angle 
 _geom_angle_site_symmetry_1 
 _geom_angle_site_symmetry_3 
 _geom_angle_publ_flag 
N1 S1 C10 89.42(7) . . ? 
C8 O3 C11 117.66(12) . . ? 
H1 N1 C1 128.7(9) . . ? 
H1 N1 S1 114.1(10) . . ? 
C1 N1 S1 116.65(10) . . ? 
C10 N2 C9 117.39(11) . . ? 
C10 N2 C12 116.68(12) . . ? 
C9 N2 C12 125.93(11) . . ? 
O1 C1 N1 122.22(13) . . ? 
O1 C1 C2 128.55(13) . . ? 
N1 C1 C2 109.23(11) . . ? 
C10 C2 C3 120.39(13) . . ? 
C10 C2 C1 111.74(13) . . ? 
C3 C2 C1 127.85(12) . . ? 
O2 C3 C2 123.01(13) . . ? 
O2 C3 C4 122.64(14) . . ? 
C2 C3 C4 114.34(12) . . ? 
C5 C4 C9 121.30(13) . . ? 
C5 C4 C3 116.40(12) . . ? 
C9 C4 C3 122.26(13) . . ? 
C6 C5 C4 118.87(13) . . ? 
F1 C6 C5 120.82(13) . . ? 
F1 C6 C7 118.54(13) . . ? 
C5 C6 C7 120.60(14) . . ? 
F2 C7 C8 119.63(12) . . ? 
F2 C7 C6 117.70(13) . . ? 
C8 C7 C6 122.61(13) . . ? 
O3 C8 C7 121.87(12) . . ? 
O3 C8 C9 120.28(13) . . ? 
C7 C8 C9 117.61(12) . . ? 
C4 C9 N2 119.64(12) . . ? 
C4 C9 C8 118.69(13) . . ? 
N2 C9 C8 121.65(12) . . ? 
N2 C10 C2 125.30(14) . . ? 
N2 C10 S1 121.73(10) . . ? 
C2 C10 S1 112.94(11) . . ? 
N2 C12 C13 120.50(12) . . ? 
N2 C12 C14 117.36(11) . . ? 
C13 C12 C14 59.72(10) . . ? 
C12 C13 C14 60.77(11) . . ? 
C13 C14 C12 59.51(10) . . ? 
F3 C15 F4 106.45(17) . . ? 
F3 C15 F5 109.08(18) . . ? 
F4 C15 F5 105.78(18) . . ? 
F3 C15 C16 111.97(17) . . ? 
F4 C15 C16 112.35(15) . . ? 
F5 C15 C16 110.92(15) . . ? 
O4 C16 O5 128.43(15) . . ? 
O4 C16 C15 121.45(14) . . ? 
O5 C16 C15 110.10(15) . . ? 
H5 O5 C16 112.1(18) . . ? 
F6' C17 F8 123.3(3) . . ? 
F6' C17 F7 31.2(4) . . ? 
F8 C17 F7 112.7(2) . . ? 
F6' C17 F6 71.6(4) . . ? 
F8 C17 F6 107.9(2) . . ? 
F7 C17 F6 102.8(2) . . ? 
F6' C17 F8' 122.1(4) . . ? 
F8 C17 F8' 33.7(2) . . ? 
F7 C17 F8' 132.0(3) . . ? 
F6 C17 F8' 76.0(3) . . ? 
F6' C17 F7' 93.4(4) . . ? 
F8 C17 F7' 51.5(2) . . ? 
F7 C17 F7' 67.7(2) . . ? 
F6 C17 F7' 142.4(2) . . ? 
F8' C17 F7' 84.3(3) . . ? 
F6' C17 C18 123.4(3) . . ? 
F8 C17 C18 110.2(2) . . ? 
F7 C17 C18 112.96(17) . . ? 
F6 C17 C18 109.96(17) . . ? 
F8' C17 C18 112.2(3) . . ? 
F7' C17 C18 107.1(2) . . ? 
O6 C18 O7 127.21(17) . . ? 
O6 C18 C17 120.40(17) . . ? 
O7 C18 C17 112.38(15) . . ? 
H7 O7 C18 115.1(14) . . ? 
  
_diffrn_measured_fraction_theta_max    0.973 
_diffrn_reflns_theta_full              29.06 
_diffrn_measured_fraction_theta_full   0.973 
_refine_diff_density_max    0.566 
_refine_diff_density_min   -0.435 
_refine_diff_density_rms    0.066 

#===END

	  
data_jw08 
  
_audit_creation_method            SHELXL-97 
_chemical_name_systematic 
; 
 ? 
; 
_chemical_name_common             ? 
_chemical_melting_point           ? 
_chemical_formula_moiety          ? 
_chemical_formula_sum 
 'C17 H17 F2 N O6 S' 
_chemical_formula_weight          401.38 
  
loop_ 
 _atom_type_symbol 
 _atom_type_description 
 _atom_type_scat_dispersion_real 
 _atom_type_scat_dispersion_imag 
 _atom_type_scat_source 
 'C'  'C'   0.0033   0.0016 
 'International Tables Vol C Tables 4.2.6.8 and 6.1.1.4' 
 'H'  'H'   0.0000   0.0000 
 'International Tables Vol C Tables 4.2.6.8 and 6.1.1.4' 
 'N'  'N'   0.0061   0.0033 
 'International Tables Vol C Tables 4.2.6.8 and 6.1.1.4' 
 'O'  'O'   0.0106   0.0060 
 'International Tables Vol C Tables 4.2.6.8 and 6.1.1.4' 
 'F'  'F'   0.0171   0.0103 
 'International Tables Vol C Tables 4.2.6.8 and 6.1.1.4' 
 'S'  'S'   0.1246   0.1234 
 'International Tables Vol C Tables 4.2.6.8 and 6.1.1.4' 
  
_symmetry_cell_setting            Monoclinic 
_symmetry_space_group_name_H-M    P2(1)/c 
  
loop_ 
 _symmetry_equiv_pos_as_xyz 
 'x, y, z' 
 '-x, y+1/2, -z+1/2' 
 '-x, -y, -z' 
 'x, -y-1/2, z-1/2' 
  
_cell_length_a                    24.528(5) 
_cell_length_b                    7.1340(14) 
_cell_length_c                    21.125(4) 
_cell_angle_alpha                 90.00 
_cell_angle_beta                  114.89(3) 
_cell_angle_gamma                 90.00 
_cell_volume                      3353.0(12) 
_cell_formula_units_Z             8 
_cell_measurement_temperature     123(2) 
_cell_measurement_reflns_used     ? 
_cell_measurement_theta_min       ? 
_cell_measurement_theta_max       ? 
  
_exptl_crystal_description        plate 
_exptl_crystal_colour             colorless 
_exptl_crystal_size_max           0.10 
_exptl_crystal_size_mid           0.10 
_exptl_crystal_size_min           0.05 
_exptl_crystal_density_meas       ? 
_exptl_crystal_density_diffrn     1.590 
_exptl_crystal_density_method     'not measured' 
_exptl_crystal_F_000              1664 
_exptl_absorpt_coefficient_mu     0.252 
_exptl_absorpt_correction_type    none 
_exptl_absorpt_correction_T_min   0.9752 
_exptl_absorpt_correction_T_max   0.9875 
_exptl_absorpt_process_details    ? 
  
_exptl_special_details 
; 
 ? 
; 
  
_diffrn_ambient_temperature       123(2) 
_diffrn_radiation_wavelength      0.71073 
_diffrn_radiation_type            MoK\a 
_diffrn_radiation_source          'fine-focus sealed tube' 
_diffrn_radiation_monochromator   graphite 
_diffrn_measurement_device_type   'Nonius KappaCCD' 
_diffrn_measurement_method        '\w scans' 
_diffrn_detector_area_resol_mean  ? 
_diffrn_standards_number          ? 
_diffrn_standards_interval_count  ? 
_diffrn_standards_interval_time   ? 
_diffrn_standards_decay_%         ? 
_diffrn_reflns_number             14391 
_diffrn_reflns_av_R_equivalents   0.0681 
_diffrn_reflns_av_sigmaI/netI     0.1161 
_diffrn_reflns_limit_h_min        -33 
_diffrn_reflns_limit_h_max        33 
_diffrn_reflns_limit_k_min        -9 
_diffrn_reflns_limit_k_max        9 
_diffrn_reflns_limit_l_min        -28 
_diffrn_reflns_limit_l_max        28 
_diffrn_reflns_theta_min          0.92 
_diffrn_reflns_theta_max          29.04 
_reflns_number_total              8698 
_reflns_number_gt                 4779 
_reflns_threshold_expression      >2sigma(I) 
  
_computing_data_collection        'Nonius Collect' 
_computing_cell_refinement        Denzo 
_computing_data_reduction         Denzo 
_computing_structure_solution     'SHELXS-97 (Sheldrick, 1990)' 
_computing_structure_refinement   'SHELXL-97 (Sheldrick, 1997)' 
_computing_molecular_graphics     'Bruker SHELXTL' 
_computing_publication_material   'Bruker SHELXTL' 
  
_refine_special_details 
; 
 Refinement of F^2^ against ALL reflections.  The weighted R-factor wR and 
 goodness of fit S are based on F^2^, conventional R-factors R are based 
 on F, with F set to zero for negative F^2^. The threshold expression of 
 F^2^ > 2sigma(F^2^) is used only for calculating R-factors(gt) etc. and is 
 not relevant to the choice of reflections for refinement.  R-factors based 
 on F^2^ are statistically about twice as large as those based on F, and R- 
 factors based on ALL data will be even larger. 
; 
  
_refine_ls_structure_factor_coef  Fsqd 
_refine_ls_matrix_type            full 
_refine_ls_weighting_scheme       calc 
_refine_ls_weighting_details 
 'calc w=1/[\s^2^(Fo^2^)+(0.1000P)^2^+0.0000P] where P=(Fo^2^+2Fc^2^)/3' 
_atom_sites_solution_primary      direct 
_atom_sites_solution_secondary    difmap 
_atom_sites_solution_hydrogens    geom 
_refine_ls_hydrogen_treatment     constr
_refine_ls_extinction_method      none 
_refine_ls_extinction_coef        ? 
_refine_ls_number_reflns          8698 
_refine_ls_number_parameters      487 
_refine_ls_number_restraints      0 
_refine_ls_R_factor_all           0.1526 
_refine_ls_R_factor_gt            0.0778 
_refine_ls_wR_factor_ref          0.2018 
_refine_ls_wR_factor_gt           0.1743 
_refine_ls_goodness_of_fit_ref    1.042 
_refine_ls_restrained_S_all       1.042 
_refine_ls_shift/su_max           0.001 
_refine_ls_shift/su_mean          0.000 
  
loop_ 
 _atom_site_label 
 _atom_site_type_symbol 
 _atom_site_fract_x 
 _atom_site_fract_y 
 _atom_site_fract_z 
 _atom_site_U_iso_or_equiv 
 _atom_site_adp_type 
 _atom_site_occupancy 
 _atom_site_symmetry_multiplicity 
 _atom_site_calc_flag 
 _atom_site_refinement_flags 
 _atom_site_disorder_assembly 
 _atom_site_disorder_group 
S1 S 0.05100(4) 0.33206(13) 0.31409(5) 0.0216(2) Uani 1 1 d . . . 
F1 F -0.16416(9) 0.9373(3) 0.43862(11) 0.0350(6) Uani 1 1 d . . . 
F2 F -0.22488(9) 0.7727(3) 0.31569(11) 0.0331(6) Uani 1 1 d . . . 
O1 O 0.00755(10) 0.2888(4) 0.24485(12) 0.0241(6) Uani 1 1 d . . . 
O2 O 0.10127(10) 0.4478(3) 0.32210(13) 0.0250(6) Uani 1 1 d . . . 
O3 O 0.14952(11) 0.4483(4) 0.47960(13) 0.0294(6) Uani 1 1 d . . . 
O4 O 0.13399(10) 0.7423(3) 0.43532(13) 0.0247(6) Uani 1 1 d . . . 
O5 O 0.05141(11) 0.7404(4) 0.51219(13) 0.0277(6) Uani 1 1 d . . . 
O6 O -0.16848(11) 0.5508(4) 0.25364(13) 0.0304(6) Uani 1 1 d . . . 
N1 N -0.04776(12) 0.4529(4) 0.33228(14) 0.0191(6) Uani 1 1 d . . . 
C1 C 0.01409(15) 0.4579(5) 0.36024(18) 0.0193(7) Uani 1 1 d . . . 
C2 C 0.04853(15) 0.5616(5) 0.41641(17) 0.0194(7) Uani 1 1 d . . . 
C3 C 0.02183(16) 0.6644(5) 0.45556(19) 0.0223(8) Uani 1 1 d . . . 
C4 C -0.04425(15) 0.6801(5) 0.41972(18) 0.0201(7) Uani 1 1 d . . . 
C5 C -0.07337(16) 0.8011(5) 0.44824(19) 0.0241(8) Uani 1 1 d . . . 
H5A H -0.0513 0.8650 0.4909 0.029 Uiso 1 1 calc R . . 
C6 C -0.13362(16) 0.8241(5) 0.4133(2) 0.0256(8) Uani 1 1 d . . . 
C7 C -0.16544(15) 0.7406(5) 0.3498(2) 0.0233(8) Uani 1 1 d . . . 
C8 C -0.13845(16) 0.6256(5) 0.31873(19) 0.0245(8) Uani 1 1 d . . . 
C9 C -0.07656(15) 0.5854(5) 0.35716(18) 0.0213(8) Uani 1 1 d . . . 
C10 C 0.07905(16) 0.1233(5) 0.3607(2) 0.0286(9) Uani 1 1 d . . . 
H10A H 0.0995 0.0505 0.3377 0.043 Uiso 1 1 calc R . . 
H10B H 0.0457 0.0497 0.3618 0.043 Uiso 1 1 calc R . . 
H10C H 0.1076 0.1533 0.4085 0.043 Uiso 1 1 calc R . . 
C11 C 0.11674(15) 0.5713(5) 0.44708(17) 0.0221(8) Uani 1 1 d . . . 
C12 C 0.19866(15) 0.7693(6) 0.4614(2) 0.0303(9) Uani 1 1 d . . . 
H12A H 0.2192 0.7003 0.5058 0.036 Uiso 1 1 calc R . . 
H12B H 0.2082 0.9041 0.4708 0.036 Uiso 1 1 calc R . . 
C13 C 0.22140(17) 0.7017(7) 0.4102(2) 0.0399(11) Uani 1 1 d . . . 
H13A H 0.2649 0.7230 0.4288 0.060 Uiso 1 1 calc R . . 
H13B H 0.2013 0.7703 0.3662 0.060 Uiso 1 1 calc R . . 
H13C H 0.2131 0.5675 0.4018 0.060 Uiso 1 1 calc R . . 
C14 C -0.20517(16) 0.6800(6) 0.1997(2) 0.0325(9) Uani 1 1 d . . . 
H14A H -0.2243 0.6131 0.1552 0.049 Uiso 1 1 calc R . . 
H14B H -0.1799 0.7808 0.1953 0.049 Uiso 1 1 calc R . . 
H14C H -0.2362 0.7336 0.2120 0.049 Uiso 1 1 calc R . . 
C15 C -0.08004(15) 0.2828(5) 0.29722(18) 0.0200(8) Uani 1 1 d . . . 
H15A H -0.0907 0.2733 0.2461 0.024 Uiso 1 1 calc R . . 
C16 C -0.12276(15) 0.1965(5) 0.3212(2) 0.0254(8) Uani 1 1 d . . . 
H16A H -0.1594 0.1377 0.2856 0.030 Uiso 1 1 calc R . . 
H16B H -0.1283 0.2581 0.3601 0.030 Uiso 1 1 calc R . . 
C17 C -0.06410(15) 0.1026(5) 0.33751(18) 0.0231(8) Uani 1 1 d . . . 
H17A H -0.0644 -0.0137 0.3118 0.028 Uiso 1 1 calc R . . 
H17B H -0.0333 0.1068 0.3863 0.028 Uiso 1 1 calc R . . 
S1' S 0.44756(4) 0.32843(13) 0.26265(5) 0.0214(2) Uani 1 1 d . . . 
F1' F 0.65989(9) 0.9441(3) 0.59576(11) 0.0338(6) Uani 1 1 d . . . 
F2' F 0.72210(9) 0.7791(3) 0.53479(11) 0.0344(6) Uani 1 1 d . . . 
O1' O 0.49134(10) 0.2856(4) 0.23638(12) 0.0254(6) Uani 1 1 d . . . 
O2' O 0.39709(11) 0.4425(4) 0.22089(12) 0.0264(6) Uani 1 1 d . . . 
O3' O 0.34719(11) 0.4458(4) 0.32980(13) 0.0298(6) Uani 1 1 d . . . 
O4' O 0.36516(10) 0.7398(3) 0.30277(13) 0.0250(6) Uani 1 1 d . . . 
O5' O 0.44562(11) 0.7328(4) 0.46015(13) 0.0268(6) Uani 1 1 d . . . 
O6' O 0.66509(11) 0.5544(4) 0.41618(13) 0.0291(6) Uani 1 1 d . . . 
N1' N 0.54556(12) 0.4527(4) 0.37796(14) 0.0203(6) Uani 1 1 d . . . 
C1' C 0.48380(15) 0.4529(5) 0.34502(18) 0.0213(8) Uani 1 1 d . . . 
C2' C 0.44860(15) 0.5559(5) 0.36769(18) 0.0202(8) Uani 1 1 d . . . 
C3' C 0.47553(16) 0.6594(5) 0.43284(18) 0.0222(8) Uani 1 1 d . . . 
C4' C 0.54116(15) 0.6774(5) 0.46134(18) 0.0214(8) Uani 1 1 d . . . 
C5' C 0.57017(16) 0.8016(5) 0.51793(18) 0.0238(8) Uani 1 1 d . . . 
H5'A H 0.5479 0.8660 0.5386 0.029 Uiso 1 1 calc R . . 
C6' C 0.62976(16) 0.8270(5) 0.54185(18) 0.0246(8) Uani 1 1 d . . . 
C7' C 0.66229(15) 0.7438(5) 0.5099(2) 0.0246(8) Uani 1 1 d . . . 
C8' C 0.63578(15) 0.6271(5) 0.45224(19) 0.0228(8) Uani 1 1 d . . . 
C9' C 0.57372(15) 0.5839(5) 0.43077(17) 0.0198(7) Uani 1 1 d . . . 
C10' C 0.42017(17) 0.1181(5) 0.2825(2) 0.0299(9) Uani 1 1 d . . . 
H10D H 0.4002 0.0439 0.2398 0.045 Uiso 1 1 calc R . . 
H10E H 0.3913 0.1473 0.3020 0.045 Uiso 1 1 calc R . . 
H10F H 0.4537 0.0463 0.3166 0.045 Uiso 1 1 calc R . . 
C11' C 0.38099(15) 0.5688(5) 0.33046(18) 0.0229(8) Uani 1 1 d . . . 
C12' C 0.30102(15) 0.7734(6) 0.2649(2) 0.0317(10) Uani 1 1 d . . . 
H12C H 0.2923 0.9073 0.2689 0.038 Uiso 1 1 calc R . . 
H12D H 0.2789 0.6976 0.2857 0.038 Uiso 1 1 calc R . . 
C13' C 0.28029(17) 0.7224(6) 0.1893(2) 0.0370(10) Uani 1 1 d . . . 
H13D H 0.2371 0.7467 0.1644 0.055 Uiso 1 1 calc R . . 
H13E H 0.2882 0.5892 0.1854 0.055 Uiso 1 1 calc R . . 
H13F H 0.3021 0.7980 0.1688 0.055 Uiso 1 1 calc R . . 
C14' C 0.70691(16) 0.6743(6) 0.4036(2) 0.0293(9) Uani 1 1 d . . . 
H14D H 0.7253 0.6047 0.3776 0.044 Uiso 1 1 calc R . . 
H14E H 0.7383 0.7160 0.4483 0.044 Uiso 1 1 calc R . . 
H14F H 0.6855 0.7836 0.3764 0.044 Uiso 1 1 calc R . . 
C15' C 0.57864(15) 0.2821(5) 0.37415(18) 0.0201(8) Uani 1 1 d . . . 
H15B H 0.5886 0.2722 0.3330 0.024 Uiso 1 1 calc R . . 
C16' C 0.62257(15) 0.1979(5) 0.44037(19) 0.0249(8) Uani 1 1 d . . . 
H16C H 0.6285 0.2606 0.4846 0.030 Uiso 1 1 calc R . . 
H16D H 0.6590 0.1389 0.4402 0.030 Uiso 1 1 calc R . . 
C17' C 0.56323(15) 0.1034(5) 0.39963(18) 0.0226(8) Uani 1 1 d . . . 
H17C H 0.5632 -0.0134 0.3743 0.027 Uiso 1 1 calc R . . 
H17D H 0.5327 0.1083 0.4188 0.027 Uiso 1 1 calc R . . 
  
loop_ 
 _atom_site_aniso_label 
 _atom_site_aniso_U_11 
 _atom_site_aniso_U_22 
 _atom_site_aniso_U_33 
 _atom_site_aniso_U_23 
 _atom_site_aniso_U_13 
 _atom_site_aniso_U_12 
S1 0.0233(4) 0.0168(5) 0.0249(5) 0.0003(4) 0.0104(4) 0.0011(4) 
F1 0.0392(13) 0.0294(13) 0.0457(14) -0.0011(11) 0.0270(11) 0.0083(10) 
F2 0.0211(11) 0.0400(14) 0.0388(13) 0.0030(11) 0.0130(10) 0.0049(10) 
O1 0.0220(13) 0.0271(15) 0.0233(13) -0.0023(11) 0.0095(11) -0.0021(11) 
O2 0.0214(12) 0.0222(14) 0.0320(14) -0.0015(12) 0.0120(11) -0.0025(10) 
O3 0.0248(13) 0.0285(16) 0.0310(14) 0.0088(13) 0.0079(12) 0.0038(12) 
O4 0.0197(12) 0.0188(14) 0.0320(14) 0.0009(11) 0.0074(11) -0.0032(10) 
O5 0.0298(14) 0.0267(15) 0.0224(14) -0.0085(12) 0.0068(12) -0.0026(11) 
O6 0.0268(13) 0.0266(15) 0.0277(14) -0.0010(12) 0.0017(11) 0.0054(11) 
N1 0.0193(14) 0.0161(15) 0.0196(15) -0.0009(12) 0.0058(12) 0.0027(11) 
C1 0.0233(17) 0.0097(17) 0.0229(18) 0.0050(14) 0.0078(15) -0.0004(14) 
C2 0.0236(17) 0.0130(18) 0.0205(18) 0.0048(15) 0.0083(15) -0.0003(14) 
C3 0.0275(18) 0.0142(18) 0.0250(19) 0.0026(16) 0.0110(16) -0.0023(15) 
C4 0.0277(18) 0.0112(17) 0.0227(18) 0.0025(15) 0.0118(15) -0.0001(14) 
C5 0.033(2) 0.0170(19) 0.0255(19) 0.0018(16) 0.0154(17) 0.0012(16) 
C6 0.036(2) 0.0163(19) 0.034(2) 0.0013(17) 0.0252(18) 0.0017(16) 
C7 0.0176(17) 0.0176(19) 0.034(2) 0.0049(16) 0.0106(16) 0.0033(14) 
C8 0.0273(19) 0.0178(19) 0.0255(19) 0.0011(16) 0.0082(16) -0.0032(15) 
C9 0.0276(18) 0.0130(18) 0.0245(19) 0.0044(15) 0.0121(16) -0.0013(15) 
C10 0.0274(19) 0.021(2) 0.037(2) 0.0008(18) 0.0132(17) 0.0017(16) 
C11 0.0247(18) 0.021(2) 0.0173(18) 0.0013(16) 0.0053(15) -0.0002(15) 
C12 0.0190(18) 0.031(2) 0.035(2) -0.0053(18) 0.0053(17) -0.0078(16) 
C13 0.026(2) 0.049(3) 0.044(3) -0.005(2) 0.0138(19) -0.008(2) 
C14 0.0238(19) 0.040(3) 0.029(2) 0.009(2) 0.0069(17) 0.0027(18) 
C15 0.0184(17) 0.0183(18) 0.0207(18) 0.0007(15) 0.0056(14) -0.0020(14) 
C16 0.0229(18) 0.023(2) 0.030(2) -0.0010(17) 0.0107(16) -0.0026(15) 
C17 0.0307(19) 0.0164(18) 0.0208(18) -0.0015(15) 0.0096(16) -0.0040(15) 
S1' 0.0238(4) 0.0167(5) 0.0222(5) -0.0014(4) 0.0081(4) -0.0021(4) 
F1' 0.0350(12) 0.0264(13) 0.0280(12) -0.0105(10) 0.0017(10) -0.0031(10) 
F2' 0.0215(11) 0.0368(14) 0.0370(13) -0.0108(11) 0.0045(10) -0.0070(10) 
O1' 0.0238(13) 0.0301(15) 0.0225(13) -0.0011(12) 0.0100(11) 0.0017(11) 
O2' 0.0256(13) 0.0231(14) 0.0254(13) 0.0003(12) 0.0058(11) 0.0006(11) 
O3' 0.0249(13) 0.0289(16) 0.0354(15) 0.0008(13) 0.0124(12) -0.0058(12) 
O4' 0.0189(12) 0.0202(14) 0.0336(15) 0.0009(11) 0.0089(11) 0.0019(10) 
O5' 0.0277(14) 0.0257(15) 0.0311(15) -0.0042(12) 0.0165(12) 0.0024(11) 
O6' 0.0259(13) 0.0271(15) 0.0380(15) -0.0087(13) 0.0171(12) -0.0055(11) 
N1' 0.0208(14) 0.0183(16) 0.0231(15) -0.0031(13) 0.0106(13) -0.0004(12) 
C1' 0.0266(18) 0.0130(18) 0.0236(18) 0.0010(15) 0.0098(16) -0.0025(14) 
C2' 0.0221(17) 0.0154(18) 0.0229(18) 0.0035(15) 0.0092(15) -0.0002(14) 
C3' 0.0293(19) 0.0123(17) 0.0235(18) 0.0039(15) 0.0098(16) 0.0019(15) 
C4' 0.0255(18) 0.0176(19) 0.0197(17) 0.0017(16) 0.0081(15) 0.0003(15) 
C5' 0.0302(19) 0.0185(19) 0.0226(18) 0.0025(16) 0.0110(16) 0.0015(16) 
C6' 0.0304(19) 0.0166(19) 0.0204(18) -0.0052(16) 0.0043(16) -0.0033(16) 
C7' 0.0175(17) 0.0161(19) 0.032(2) -0.0002(16) 0.0022(16) -0.0004(14) 
C8' 0.0240(18) 0.0170(19) 0.0258(19) 0.0025(15) 0.0088(16) -0.0003(15) 
C9' 0.0247(18) 0.0140(18) 0.0210(18) 0.0055(15) 0.0099(15) 0.0030(14) 
C10' 0.032(2) 0.023(2) 0.031(2) -0.0009(17) 0.0092(18) -0.0067(17) 
C11' 0.0273(19) 0.020(2) 0.0231(18) 0.0017(16) 0.0126(16) 0.0008(16) 
C12' 0.0145(18) 0.038(2) 0.039(2) 0.0051(19) 0.0070(17) 0.0080(16) 
C13' 0.030(2) 0.042(3) 0.037(2) 0.000(2) 0.0114(19) -0.0045(19) 
C14' 0.0256(19) 0.030(2) 0.034(2) 0.0013(19) 0.0145(17) -0.0034(17) 
C15' 0.0206(17) 0.0166(18) 0.0230(19) -0.0020(15) 0.0090(15) 0.0010(14) 
C16' 0.0241(18) 0.022(2) 0.0264(19) 0.0050(16) 0.0088(16) 0.0035(15) 
C17' 0.0266(18) 0.0144(18) 0.0262(19) 0.0042(16) 0.0105(16) 0.0025(15) 
  
_geom_special_details 
; 
 All esds (except the esd in the dihedral angle between two l.s. planes) 
 are estimated using the full covariance matrix.  The cell esds are taken 
 into account individually in the estimation of esds in distances, angles 
 and torsion angles; correlations between esds in cell parameters are only 
 used when they are defined by crystal symmetry.  An approximate (isotropic) 
 treatment of cell esds is used for estimating esds involving l.s. planes. 
; 
  
loop_ 
 _geom_bond_atom_site_label_1 
 _geom_bond_atom_site_label_2 
 _geom_bond_distance 
 _geom_bond_site_symmetry_2 
 _geom_bond_publ_flag 
S1 O2 1.433(3) . ? 
S1 O1 1.435(3) . ? 
S1 C10 1.758(4) . ? 
S1 C1 1.822(4) . ? 
F1 C6 1.354(4) . ? 
F2 C7 1.346(4) . ? 
O3 C11 1.193(4) . ? 
O4 C11 1.348(4) . ? 
O4 C12 1.456(4) . ? 
O5 C3 1.233(4) . ? 
O6 C8 1.366(4) . ? 
O6 C14 1.448(4) . ? 
N1 C1 1.378(4) . ? 
N1 C9 1.407(4) . ? 
N1 C15 1.468(4) . ? 
C1 C2 1.351(5) . ? 
C2 C3 1.451(5) . ? 
C2 C11 1.520(5) . ? 
C3 C4 1.476(5) . ? 
C4 C9 1.396(5) . ? 
C4 C5 1.407(5) . ? 
C5 C6 1.355(5) . ? 
C6 C7 1.373(5) . ? 
C7 C8 1.381(5) . ? 
C8 C9 1.417(5) . ? 
C12 C13 1.490(6) . ? 
C15 C16 1.477(5) . ? 
C15 C17 1.500(5) . ? 
C16 C17 1.490(5) . ? 
S1' O2' 1.433(3) . ? 
S1' O1' 1.434(3) . ? 
S1' C10' 1.765(4) . ? 
S1' C1' 1.818(4) . ? 
F1' C6' 1.354(4) . ? 
F2' C7' 1.358(4) . ? 
O3' C11' 1.203(4) . ? 
O4' C11' 1.338(4) . ? 
O4' C12' 1.453(4) . ? 
O5' C3' 1.225(4) . ? 
O6' C8' 1.352(4) . ? 
O6' C14' 1.443(4) . ? 
N1' C1' 1.375(4) . ? 
N1' C9' 1.396(4) . ? 
N1' C15' 1.483(4) . ? 
C1' C2' 1.365(5) . ? 
C2' C3' 1.453(5) . ? 
C2' C11' 1.510(5) . ? 
C3' C4' 1.468(5) . ? 
C4' C9' 1.391(5) . ? 
C4' C5' 1.416(5) . ? 
C5' C6' 1.342(5) . ? 
C6' C7' 1.378(5) . ? 
C7' C8' 1.390(5) . ? 
C8' C9' 1.427(5) . ? 
C12' C13' 1.503(6) . ? 
C15' C16' 1.487(5) . ? 
C15' C17' 1.493(5) . ? 
C16' C17' 1.503(5) . ? 
  
loop_ 
 _geom_angle_atom_site_label_1 
 _geom_angle_atom_site_label_2 
 _geom_angle_atom_site_label_3 
 _geom_angle 
 _geom_angle_site_symmetry_1 
 _geom_angle_site_symmetry_3 
 _geom_angle_publ_flag 
O2 S1 O1 118.49(15) . . ? 
O2 S1 C10 107.90(17) . . ? 
O1 S1 C10 109.65(17) . . ? 
O2 S1 C1 104.44(15) . . ? 
O1 S1 C1 109.17(15) . . ? 
C10 S1 C1 106.48(17) . . ? 
C11 O4 C12 115.2(3) . . ? 
C8 O6 C14 115.9(3) . . ? 
C1 N1 C9 117.2(3) . . ? 
C1 N1 C15 120.0(3) . . ? 
C9 N1 C15 119.7(3) . . ? 
C2 C1 N1 124.0(3) . . ? 
C2 C1 S1 118.2(3) . . ? 
N1 C1 S1 117.6(2) . . ? 
C1 C2 C3 120.8(3) . . ? 
C1 C2 C11 124.6(3) . . ? 
C3 C2 C11 114.5(3) . . ? 
O5 C3 C2 123.5(3) . . ? 
O5 C3 C4 122.3(3) . . ? 
C2 C3 C4 114.0(3) . . ? 
C9 C4 C5 120.9(3) . . ? 
C9 C4 C3 120.8(3) . . ? 
C5 C4 C3 118.2(3) . . ? 
C6 C5 C4 118.4(3) . . ? 
F1 C6 C5 121.0(3) . . ? 
F1 C6 C7 117.6(3) . . ? 
C5 C6 C7 121.3(3) . . ? 
F2 C7 C6 119.4(3) . . ? 
F2 C7 C8 118.4(3) . . ? 
C6 C7 C8 122.2(3) . . ? 
O6 C8 C7 123.2(3) . . ? 
O6 C8 C9 119.4(3) . . ? 
C7 C8 C9 117.4(3) . . ? 
C4 C9 N1 120.3(3) . . ? 
C4 C9 C8 119.2(3) . . ? 
N1 C9 C8 120.5(3) . . ? 
O3 C11 O4 125.7(3) . . ? 
O3 C11 C2 124.5(3) . . ? 
O4 C11 C2 109.7(3) . . ? 
O4 C12 C13 111.4(3) . . ? 
N1 C15 C16 118.8(3) . . ? 
N1 C15 C17 117.8(3) . . ? 
C16 C15 C17 60.1(2) . . ? 
C15 C16 C17 60.8(2) . . ? 
C16 C17 C15 59.2(2) . . ? 
O2' S1' O1' 118.45(15) . . ? 
O2' S1' C10' 108.21(17) . . ? 
O1' S1' C10' 109.42(18) . . ? 
O2' S1' C1' 105.04(16) . . ? 
O1' S1' C1' 109.29(16) . . ? 
C10' S1' C1' 105.66(17) . . ? 
C11' O4' C12' 116.0(3) . . ? 
C8' O6' C14' 117.7(3) . . ? 
C1' N1' C9' 118.2(3) . . ? 
C1' N1' C15' 119.0(3) . . ? 
C9' N1' C15' 119.7(3) . . ? 
C2' C1' N1' 123.2(3) . . ? 
C2' C1' S1' 118.2(3) . . ? 
N1' C1' S1' 118.3(3) . . ? 
C1' C2' C3' 120.2(3) . . ? 
C1' C2' C11' 124.6(3) . . ? 
C3' C2' C11' 115.1(3) . . ? 
O5' C3' C2' 122.7(3) . . ? 
O5' C3' C4' 122.7(3) . . ? 
C2' C3' C4' 114.6(3) . . ? 
C9' C4' C5' 120.6(3) . . ? 
C9' C4' C3' 120.8(3) . . ? 
C5' C4' C3' 118.4(3) . . ? 
C6' C5' C4' 118.9(4) . . ? 
C5' C6' F1' 121.5(3) . . ? 
C5' C6' C7' 121.4(3) . . ? 
F1' C6' C7' 117.0(3) . . ? 
F2' C7' C6' 119.0(3) . . ? 
F2' C7' C8' 118.8(3) . . ? 
C6' C7' C8' 122.2(3) . . ? 
O6' C8' C7' 124.0(3) . . ? 
O6' C8' C9' 119.2(3) . . ? 
C7' C8' C9' 116.8(3) . . ? 
C4' C9' N1' 120.3(3) . . ? 
C4' C9' C8' 119.5(3) . . ? 
N1' C9' C8' 120.1(3) . . ? 
O3' C11' O4' 126.0(3) . . ? 
O3' C11' C2' 124.2(3) . . ? 
O4' C11' C2' 109.7(3) . . ? 
O4' C12' C13' 110.4(3) . . ? 
N1' C15' C16' 118.5(3) . . ? 
N1' C15' C17' 117.0(3) . . ? 
C16' C15' C17' 60.6(2) . . ? 
C15' C16' C17' 59.9(2) . . ? 
C15' C17' C16' 59.5(2) . . ? 
  
_diffrn_measured_fraction_theta_max    0.970 
_diffrn_reflns_theta_full              29.04 
_diffrn_measured_fraction_theta_full   0.970 
_refine_diff_density_max    1.860 
_refine_diff_density_min   -0.606 
_refine_diff_density_rms    0.109 

#===END

  
data_jw06 
  
_audit_creation_method            SHELXL-97 
_chemical_name_systematic 
; 
 ? 
; 
_chemical_name_common             ? 
_chemical_melting_point           ? 
_chemical_formula_moiety          ? 
_chemical_formula_sum 
 'C16 H15 F2 N O4 S' 
_chemical_formula_weight          355.35 
  
loop_ 
 _atom_type_symbol 
 _atom_type_description 
 _atom_type_scat_dispersion_real 
 _atom_type_scat_dispersion_imag 
 _atom_type_scat_source 
 'C'  'C'   0.0033   0.0016 
 'International Tables Vol C Tables 4.2.6.8 and 6.1.1.4' 
 'H'  'H'   0.0000   0.0000 
 'International Tables Vol C Tables 4.2.6.8 and 6.1.1.4' 
 'N'  'N'   0.0061   0.0033 
 'International Tables Vol C Tables 4.2.6.8 and 6.1.1.4' 
 'O'  'O'   0.0106   0.0060 
 'International Tables Vol C Tables 4.2.6.8 and 6.1.1.4' 
 'F'  'F'   0.0171   0.0103 
 'International Tables Vol C Tables 4.2.6.8 and 6.1.1.4' 
 'S'  'S'   0.1246   0.1234 
 'International Tables Vol C Tables 4.2.6.8 and 6.1.1.4' 
  
_symmetry_cell_setting            Triclinic 
_symmetry_space_group_name_H-M    P-1 
  
loop_ 
 _symmetry_equiv_pos_as_xyz 
 'x, y, z' 
 '-x, -y, -z' 
  
_cell_length_a                    8.8361(18) 
_cell_length_b                    9.6639(19) 
_cell_length_c                    10.439(2) 
_cell_angle_alpha                 101.76(3) 
_cell_angle_beta                  99.69(3) 
_cell_angle_gamma                 113.51(3) 
_cell_volume                      768.7(3) 
_cell_formula_units_Z             2 
_cell_measurement_temperature     173(2) 
_cell_measurement_reflns_used     ? 
_cell_measurement_theta_min       ? 
_cell_measurement_theta_max       ? 
  
_exptl_crystal_description        block 
_exptl_crystal_colour             colorless 
_exptl_crystal_size_max           0.20 
_exptl_crystal_size_mid           0.20 
_exptl_crystal_size_min           0.20 
_exptl_crystal_density_meas       ? 
_exptl_crystal_density_diffrn     1.535 
_exptl_crystal_density_method     'not measured' 
_exptl_crystal_F_000              368 
_exptl_absorpt_coefficient_mu     0.254 
_exptl_absorpt_correction_type    none 
_exptl_absorpt_correction_T_min   0.9509 
_exptl_absorpt_correction_T_max   0.9509 
_exptl_absorpt_process_details    ? 
  
_exptl_special_details 
; 
 ? 
; 
  
_diffrn_ambient_temperature       173(2) 
_diffrn_radiation_wavelength      0.71073 
_diffrn_radiation_type            MoK\a 
_diffrn_radiation_source          'fine-focus sealed tube' 
_diffrn_radiation_monochromator   graphite 
_diffrn_measurement_device_type   'Nonius KappaCCD' 
_diffrn_measurement_method        '\w scans' 
_diffrn_detector_area_resol_mean  ? 
_diffrn_standards_number          ? 
_diffrn_standards_interval_count  ? 
_diffrn_standards_interval_time   ? 
_diffrn_standards_decay_%         ? 
_diffrn_reflns_number             6440 
_diffrn_reflns_av_R_equivalents   0.0317 
_diffrn_reflns_av_sigmaI/netI     0.0514 
_diffrn_reflns_limit_h_min        -12 
_diffrn_reflns_limit_h_max        12 
_diffrn_reflns_limit_k_min        -13 
_diffrn_reflns_limit_k_max        13 
_diffrn_reflns_limit_l_min        -14 
_diffrn_reflns_limit_l_max        14 
_diffrn_reflns_theta_min          2.07 
_diffrn_reflns_theta_max          29.03 
_reflns_number_total              3972 
_reflns_number_gt                 3056 
_reflns_threshold_expression      >2sigma(I) 
  
_computing_data_collection        'Nonius Collect' 
_computing_cell_refinement        Denzo 
_computing_data_reduction         Denzo 
_computing_structure_solution     'SHELXS-97 (Sheldrick, 1990)' 
_computing_structure_refinement   'SHELXL-97 (Sheldrick, 1997)' 
_computing_molecular_graphics     'Bruker SHELXTL' 
_computing_publication_material   'Bruker SHELXTL' 
  
_refine_special_details 
; 
 Refinement of F^2^ against ALL reflections.  The weighted R-factor wR and 
 goodness of fit S are based on F^2^, conventional R-factors R are based 
 on F, with F set to zero for negative F^2^. The threshold expression of 
 F^2^ > 2sigma(F^2^) is used only for calculating R-factors(gt) etc. and is 
 not relevant to the choice of reflections for refinement.  R-factors based 
 on F^2^ are statistically about twice as large as those based on F, and R- 
 factors based on ALL data will be even larger. 
; 
  
_refine_ls_structure_factor_coef  Fsqd 
_refine_ls_matrix_type            full 
_refine_ls_weighting_scheme       calc 
_refine_ls_weighting_details 
 'calc w=1/[\s^2^(Fo^2^)+(0.1000P)^2^+0.0000P] where P=(Fo^2^+2Fc^2^)/3' 
_atom_sites_solution_primary      direct 
_atom_sites_solution_secondary    difmap 
_atom_sites_solution_hydrogens    geom 
_refine_ls_hydrogen_treatment     mixed 
_refine_ls_extinction_method      none 
_refine_ls_extinction_coef        ? 
_refine_ls_number_reflns          3972 
_refine_ls_number_parameters      221 
_refine_ls_number_restraints      0 
_refine_ls_R_factor_all           0.0700 
_refine_ls_R_factor_gt            0.0507 
_refine_ls_wR_factor_ref          0.1581 
_refine_ls_wR_factor_gt           0.1459 
_refine_ls_goodness_of_fit_ref    1.089 
_refine_ls_restrained_S_all       1.089 
_refine_ls_shift/su_max           0.015 
_refine_ls_shift/su_mean          0.003 
  
loop_ 
 _atom_site_label 
 _atom_site_type_symbol 
 _atom_site_fract_x 
 _atom_site_fract_y 
 _atom_site_fract_z 
 _atom_site_U_iso_or_equiv 
 _atom_site_adp_type 
 _atom_site_occupancy 
 _atom_site_symmetry_multiplicity 
 _atom_site_calc_flag 
 _atom_site_refinement_flags 
 _atom_site_disorder_assembly 
 _atom_site_disorder_group 
S1 S 0.28115(6) 0.29480(5) 0.68907(4) 0.03735(17) Uani 1 1 d . . . 
F1 F 0.86887(15) 0.44404(16) 1.13586(12) 0.0571(4) Uani 1 1 d . . . 
F2 F 0.57681(18) 0.18180(14) 1.07970(11) 0.0591(4) Uani 1 1 d . . . 
O1 O 0.79185(15) 0.70382(15) 0.78861(13) 0.0399(3) Uani 1 1 d . . . 
O2 O 0.41429(16) 0.71366(15) 0.51397(12) 0.0401(3) Uani 1 1 d . . . 
O3 O 0.64056(16) 0.86294(14) 0.69474(12) 0.0385(3) Uani 1 1 d . . . 
O4 O 0.2992(2) 0.10923(18) 0.85207(15) 0.0784(6) Uani 1 1 d . . . 
N1 N 0.20407(19) 0.44107(18) 0.53141(14) 0.0333(3) Uani 1 1 d . . . 
H1 H 0.225(3) 0.513(3) 0.496(2) 0.050(6) Uiso 1 1 d . . . 
C1 C 0.4977(2) 0.58991(19) 0.67095(15) 0.0290(3) Uani 1 1 d . . . 
C2 C 0.6445(2) 0.60105(19) 0.76660(16) 0.0310(4) Uani 1 1 d . . . 
C3 C 0.6182(2) 0.4847(2) 0.84566(16) 0.0315(4) Uani 1 1 d . . . 
C4 C 0.7576(2) 0.5171(2) 0.95417(18) 0.0372(4) Uani 1 1 d . . . 
H4A H 0.8641 0.6081 0.9739 0.045 Uiso 1 1 calc R . . 
C5 C 0.7369(3) 0.4151(2) 1.03072(18) 0.0414(4) Uani 1 1 d . . . 
C6 C 0.5853(3) 0.2796(2) 1.00294(18) 0.0430(5) Uani 1 1 d . . . 
C7 C 0.4467(3) 0.2440(2) 0.89596(18) 0.0432(5) Uani 1 1 d . . . 
C8 C 0.4649(2) 0.3502(2) 0.81902(16) 0.0338(4) Uani 1 1 d . . . 
C9 C 0.3364(2) 0.45772(19) 0.62693(15) 0.0297(3) Uani 1 1 d . . . 
C10 C 0.5127(2) 0.7235(2) 0.61687(16) 0.0308(3) Uani 1 1 d . . . 
C11 C 0.6479(3) 1.0003(2) 0.6546(2) 0.0461(5) Uani 1 1 d . . . 
H11A H 0.5409 1.0104 0.6559 0.055 Uiso 1 1 calc R . . 
H11B H 0.6611 0.9900 0.5613 0.055 Uiso 1 1 calc R . . 
C12 C 0.7995(3) 1.1425(2) 0.7545(2) 0.0535(5) Uani 1 1 d . . . 
H12A H 0.8080 1.2378 0.7306 0.080 Uiso 1 1 calc R . . 
H12B H 0.9045 1.1315 0.7518 0.080 Uiso 1 1 calc R . . 
H12C H 0.7850 1.1512 0.8464 0.080 Uiso 1 1 calc R . . 
C13 C 0.2123(3) 0.0434(3) 0.9424(2) 0.0541(5) Uani 1 1 d . . . 
H13A H 0.1077 -0.0537 0.8904 0.081 Uiso 1 1 calc R . . 
H13B H 0.1814 0.1194 0.9949 0.081 Uiso 1 1 calc R . . 
H13C H 0.2871 0.0188 1.0046 0.081 Uiso 1 1 calc R . . 
C14 C 0.0313(2) 0.3211(2) 0.50205(17) 0.0352(4) Uani 1 1 d . . . 
H14A H -0.0265 0.3282 0.5760 0.042 Uiso 1 1 calc R . . 
C15 C -0.0190(2) 0.1573(2) 0.41415(17) 0.0378(4) Uani 1 1 d . . . 
H15A H 0.0702 0.1373 0.3793 0.045 Uiso 1 1 calc R . . 
H15B H -0.1032 0.0670 0.4354 0.045 Uiso 1 1 calc R . . 
C16 C -0.0815(2) 0.2625(2) 0.35956(18) 0.0376(4) Uani 1 1 d . . . 
H16A H -0.0309 0.3071 0.2909 0.045 Uiso 1 1 calc R . . 
H16B H -0.2042 0.2369 0.3470 0.045 Uiso 1 1 calc R . . 
  
loop_ 
 _atom_site_aniso_label 
 _atom_site_aniso_U_11 
 _atom_site_aniso_U_22 
 _atom_site_aniso_U_33 
 _atom_site_aniso_U_23 
 _atom_site_aniso_U_13 
 _atom_site_aniso_U_12 
S1 0.0401(3) 0.0296(2) 0.0296(2) 0.01112(17) 0.00206(18) 0.00525(19) 
F1 0.0553(8) 0.0710(9) 0.0511(7) 0.0255(6) 0.0001(6) 0.0364(7) 
F2 0.0842(9) 0.0455(7) 0.0439(7) 0.0219(6) -0.0001(6) 0.0283(7) 
O1 0.0288(6) 0.0430(7) 0.0439(7) 0.0169(6) 0.0089(5) 0.0109(6) 
O2 0.0397(7) 0.0382(7) 0.0398(7) 0.0180(6) 0.0059(5) 0.0139(6) 
O3 0.0416(7) 0.0269(6) 0.0397(7) 0.0130(5) 0.0069(5) 0.0088(5) 
O4 0.0991(13) 0.0427(9) 0.0371(8) 0.0194(7) -0.0076(8) -0.0156(9) 
N1 0.0333(7) 0.0304(7) 0.0300(7) 0.0096(6) 0.0044(6) 0.0099(6) 
C1 0.0314(8) 0.0279(8) 0.0259(7) 0.0075(6) 0.0089(6) 0.0116(7) 
C2 0.0341(8) 0.0309(8) 0.0277(8) 0.0073(6) 0.0103(6) 0.0143(7) 
C3 0.0369(9) 0.0312(8) 0.0292(8) 0.0079(6) 0.0088(7) 0.0187(7) 
C4 0.0379(9) 0.0411(10) 0.0371(9) 0.0121(8) 0.0091(7) 0.0223(8) 
C5 0.0508(11) 0.0464(11) 0.0339(9) 0.0110(8) 0.0042(8) 0.0318(9) 
C6 0.0665(13) 0.0376(10) 0.0308(9) 0.0129(8) 0.0092(8) 0.0295(10) 
C7 0.0596(12) 0.0284(9) 0.0318(9) 0.0088(7) 0.0040(8) 0.0136(9) 
C8 0.0423(9) 0.0318(9) 0.0250(7) 0.0069(6) 0.0068(7) 0.0162(7) 
C9 0.0344(8) 0.0284(8) 0.0255(7) 0.0076(6) 0.0097(6) 0.0131(7) 
C10 0.0300(8) 0.0325(8) 0.0303(8) 0.0106(7) 0.0112(6) 0.0127(7) 
C11 0.0480(11) 0.0333(10) 0.0564(12) 0.0206(9) 0.0146(9) 0.0142(8) 
C12 0.0607(13) 0.0341(10) 0.0588(13) 0.0143(9) 0.0221(10) 0.0121(9) 
C13 0.0545(12) 0.0671(14) 0.0364(10) 0.0105(10) 0.0154(9) 0.0246(11) 
C14 0.0303(8) 0.0361(9) 0.0324(8) 0.0074(7) 0.0087(7) 0.0099(7) 
C15 0.0343(9) 0.0320(9) 0.0384(9) 0.0107(7) 0.0051(7) 0.0083(7) 
C16 0.0307(9) 0.0409(10) 0.0355(9) 0.0079(7) 0.0032(7) 0.0146(8) 
  
_geom_special_details 
; 
 All esds (except the esd in the dihedral angle between two l.s. planes) 
 are estimated using the full covariance matrix.  The cell esds are taken 
 into account individually in the estimation of esds in distances, angles 
 and torsion angles; correlations between esds in cell parameters are only 
 used when they are defined by crystal symmetry.  An approximate (isotropic) 
 treatment of cell esds is used for estimating esds involving l.s. planes. 
; 
  
loop_ 
 _geom_bond_atom_site_label_1 
 _geom_bond_atom_site_label_2 
 _geom_bond_distance 
 _geom_bond_site_symmetry_2 
 _geom_bond_publ_flag 
S1 C8 1.7413(19) . ? 
S1 C9 1.7458(17) . ? 
F1 C5 1.351(2) . ? 
F2 C6 1.347(2) . ? 
O1 C2 1.228(2) . ? 
O2 C10 1.2233(19) . ? 
O3 C10 1.335(2) . ? 
O3 C11 1.452(2) . ? 
O4 C7 1.344(2) . ? 
O4 C13 1.408(3) . ? 
N1 H1 0.82(2) . ? 
N1 C9 1.334(2) . ? 
N1 C14 1.433(2) . ? 
C1 C9 1.401(2) . ? 
C1 C2 1.449(2) . ? 
C1 C10 1.480(2) . ? 
C2 C3 1.495(2) . ? 
C3 C8 1.386(3) . ? 
C3 C4 1.406(2) . ? 
C4 C5 1.367(3) . ? 
C5 C6 1.382(3) . ? 
C6 C7 1.382(3) . ? 
C7 C8 1.405(2) . ? 
C11 C12 1.499(3) . ? 
C14 C16 1.495(2) . ? 
C14 C15 1.502(3) . ? 
C15 C16 1.497(2) . ? 
  
loop_ 
 _geom_angle_atom_site_label_1 
 _geom_angle_atom_site_label_2 
 _geom_angle_atom_site_label_3 
 _geom_angle 
 _geom_angle_site_symmetry_1 
 _geom_angle_site_symmetry_3 
 _geom_angle_publ_flag 
C8 S1 C9 102.68(9) . . ? 
C10 O3 C11 116.14(14) . . ? 
C7 O4 C13 122.13(16) . . ? 
H1 N1 C9 114.7(15) . . ? 
H1 N1 C14 120.5(15) . . ? 
C9 N1 C14 124.26(14) . . ? 
C9 C1 C2 123.26(15) . . ? 
C9 C1 C10 116.59(14) . . ? 
C2 C1 C10 120.15(15) . . ? 
O1 C2 C1 123.36(15) . . ? 
O1 C2 C3 117.26(15) . . ? 
C1 C2 C3 119.37(15) . . ? 
C8 C3 C4 119.11(16) . . ? 
C8 C3 C2 123.76(15) . . ? 
C4 C3 C2 117.11(16) . . ? 
C5 C4 C3 118.75(18) . . ? 
F1 C5 C4 119.83(18) . . ? 
F1 C5 C6 117.92(17) . . ? 
C4 C5 C6 122.24(17) . . ? 
F2 C6 C5 118.80(17) . . ? 
F2 C6 C7 120.96(18) . . ? 
C5 C6 C7 120.22(17) . . ? 
O4 C7 C6 125.27(17) . . ? 
O4 C7 C8 116.49(16) . . ? 
C6 C7 C8 118.03(17) . . ? 
C3 C8 C7 121.62(16) . . ? 
C3 C8 S1 124.45(13) . . ? 
C7 C8 S1 113.93(14) . . ? 
N1 C9 C1 123.77(15) . . ? 
N1 C9 S1 111.18(12) . . ? 
C1 C9 S1 125.05(12) . . ? 
O2 C10 O3 120.92(15) . . ? 
O2 C10 C1 124.87(16) . . ? 
O3 C10 C1 114.12(14) . . ? 
O3 C11 C12 107.31(16) . . ? 
N1 C14 C16 118.07(15) . . ? 
N1 C14 C15 119.24(15) . . ? 
C16 C14 C15 59.94(12) . . ? 
C16 C15 C14 59.78(12) . . ? 
C14 C16 C15 60.28(12) . . ? 
  
_diffrn_measured_fraction_theta_max    0.971 
_diffrn_reflns_theta_full              29.03 
_diffrn_measured_fraction_theta_full   0.971 
_refine_diff_density_max    0.636 
_refine_diff_density_min   -0.549 
_refine_diff_density_rms    0.049 

#===END
